# Supplementary material for: The Effect of Steaming and Fermentation on Nutritive Values, Antioxidant Activities, and Inhibitory Properties of Tea Leaves
Source: PubMed Central journal article supplement (PMC7827290; doi:10.3390/foods10010117), 2021-01-08
Supplement: foods-10-00117-s001.pdf [file foods-10-00117-s001.pdf]

# Supplementary materials

## The effect of steaming and fermentation on nutritive values, antioxidant activities, and inhibitory properties of tea leaves

Chaowanee Chupeerach<sup>1,2</sup>, Amornrat Aursalung<sup>1</sup>, Thareerat Watcharachaisoponsiri<sup>1</sup>, Kanyawee Whanmek<sup>1</sup>, Parunya Thiyajai<sup>1</sup>, Kachakot Yosphan<sup>1</sup>, Varittha Sritalahareuthai<sup>1</sup>, Yuraporn Sahasakul<sup>1,2</sup>, Chalath Santivarangkna<sup>1,2</sup> and Uthaiwan Suttisansanee<sup>1,2,\*</sup>

<sup>1</sup> Institute of Nutrition, Mahidol University, Salaya, Phuttamonthon, Nakhon Pathom 73170, Thailand; chaowanee.chu@mahidol.ac.th (C.C.); amornrat.aur@mahidol.ac.th (A.A.); thareerat.wat@hotmail.com (T.W.); kanyaweebiosci@gmail.com (K.W.); parunya.thy@mahidol.ac.th (P.T.); kachakot.y.p@gmail.com (K.Y.); varittha.sri@hotmail.com (V.S.); yuraporn.sah@mahidol.ac.th (Y.S.); chalat.san@mahidol.ac.th (C.S.); uthaiwan.sut@mahidol.ac.th (U.S.)

<sup>2</sup> Food and Nutrition Academic and Research Cluster, Institute of Nutrition, Mahidol University, Salaya, Phuttamonthon, Nakhon Pathom 73170, Thailand

\* Correspondence: uthaiwan.sut@mahidol.ac.th; Tel.: +662-800-2380 ext. 422

### Supplementary Table S1:

Nutrient compositions of fresh, steamed, and fermented tea leaves per 100 g fresh weight.

| Nutrients                      | Nutritive values (per 100 g fresh weight) |                            |                            |
|--------------------------------|-------------------------------------------|----------------------------|----------------------------|
|                                | Fresh leaves                              | Steamed leaves             | Fermented leaves           |
| <b>Energy (kcal)</b>           | 24.36 ± 0.64 <sup>c</sup>                 | 78.66 ± 4.74 <sup>a</sup>  | 61.14 ± 4.52 <sup>b</sup>  |
| <b>Moisture content (g)</b>    | 93.46 ± 0.15 <sup>a</sup>                 | 79.65 ± 1.19 <sup>c</sup>  | 84.32 ± 1.13 <sup>b</sup>  |
| <b>Protein (g)</b>             | 3.30 ± 0.00 <sup>c</sup>                  | 5.02 ± 0.02 <sup>a</sup>   | 3.53 ± 0.03 <sup>b</sup>   |
| <b>Fat (g)</b>                 | 0.12 ± 0.01 <sup>c</sup>                  | 0.36 ± 0.01 <sup>b</sup>   | 0.50 ± 0.00 <sup>a</sup>   |
| <b>Carbohydrate (g)</b>        | 2.54 ± 0.14 <sup>c</sup>                  | 13.85 ± 1.17 <sup>a</sup>  | 10.63 ± 1.10 <sup>b</sup>  |
| <b>Total dietary fiber (g)</b> | 5.76 ± 0.15 <sup>c</sup>                  | 10.56 ± 0.04 <sup>a</sup>  | 7.84 ± 0.01 <sup>b</sup>   |
| Soluble dietary fiber (g)      | 1.00 ± 0.04 <sup>c</sup>                  | 2.74 ± 0.02 <sup>a</sup>   | 2.16 ± 0.11 <sup>b</sup>   |
| Insoluble dietary fiber (g)    | 4.76 ± 0.11 <sup>c</sup>                  | 7.82 ± 0.01 <sup>a</sup>   | 5.68 ± 0.12 <sup>b</sup>   |
| <b>Ash (g)</b>                 | 0.60 ± 0.01 <sup>c</sup>                  | 1.13 ± 0.00 <sup>a</sup>   | 1.02 ± 0.00 <sup>b</sup>   |
| <b>Minerals</b>                |                                           |                            |                            |
| Calcium (mg)                   | 38.42 ± 0.09 <sup>c</sup>                 | 103.80 ± 0.52 <sup>a</sup> | 70.90 ± 0.19 <sup>b</sup>  |
| Sodium (mg)                    | 14.84 ± 0.66 <sup>c</sup>                 | 21.75 ± 0.73 <sup>b</sup>  | 110.30 ± 0.59 <sup>a</sup> |
| Potassium (mg)                 | 178.24 ± 1.28 <sup>c</sup>                | 290.85 ± 0.71 <sup>a</sup> | 272.47 ± 7.33 <sup>b</sup> |
| Magnesium (mg)                 | 15.97 ± 0.50 <sup>c</sup>                 | 29.76 ± 0.19 <sup>a</sup>  | 20.00 ± 0.58 <sup>b</sup>  |
| Iron (mg)                      | 0.47 ± 0.02 <sup>c</sup>                  | 1.21 ± 0.00 <sup>a</sup>   | 1.05 ± 0.01 <sup>b</sup>   |
| Zinc (mg)                      | 0.57 ± 0.02 <sup>a</sup>                  | 0.36 ± 0.02 <sup>b</sup>   | 0.32 ± 0.01 <sup>c</sup>   |
| <b>Vitamins</b>                |                                           |                            |                            |
| Vitamin B1 (mg)                | 0.17 ± 0.01 <sup>c</sup>                  | 0.85 ± 0.04 <sup>a</sup>   | 0.40 ± 0.00 <sup>b</sup>   |
| Vitamin B2 (mg)                | 0.10 ± 0.01 <sup>b</sup>                  | 0.14 ± 0.01 <sup>a</sup>   | 0.05 ± 0.00 <sup>c</sup>   |
| Niacin (B3) (mg)               | 0.71 ± 0.01 <sup>b</sup>                  | 0.75 ± 0.02 <sup>a</sup>   | 0.42 ± 0.00 <sup>c</sup>   |
| Vitamin C (mg)                 | 3.84 ± 0.15 <sup>b</sup>                  | 9.35 ± 0.27 <sup>a</sup>   | ND                         |

All data were expressed as mean ± SD of triplicate experiments; ND: not detected. <sup>a-c</sup> showed significant difference ( $p < 0.05$ ) of the same nutrients in different samples using one way ANOVA followed by Duncan's *post hoc* test.

## Supplementary Table S2:

The validation parameters used for HPLC analysis.

| Standards               | Retention time (min) | Linear range (µg/mL) | Linear regression equation | Correlation coefficient (R <sup>2</sup> ) | LOQ (µg/mL) | LOQ (µg/mL) | RSD (%) |
|-------------------------|----------------------|----------------------|----------------------------|-------------------------------------------|-------------|-------------|---------|
| <b>Phenolic acids</b>   |                      |                      |                            |                                           |             |             |         |
| Gallic acid             | 5.01-5.27            | 0.78-200.00          | $y = 38.814x + 43.836$     | 0.9998                                    | 2.66        | 8.07        | 1.37    |
| 4-Hydroxybenzoic acid   | 13.58-14.53          | 0.39-100.00          | $y = 54.999x - 11.469$     | 0.9994                                    | 0.32        | 0.98        | 1.86    |
| Chlorogenic acid        | 13.94-14.56          | 0.39-100.00          | $y = 45.107x - 8.1659$     | 1.0000                                    | 0.03        | 0.10        | 1.59    |
| Caffeic acid            | 17.06-17.80          | 0.39-100.00          | $y = 76.614x + 15.797$     | 0.9998                                    | 0.59        | 1.78        | 1.70    |
| Syringic acid           | 17.95-18.83          | 0.65-166.67          | $y = 37.286x - 24.557$     | 0.9990                                    | 1.12        | 3.41        | 1.63    |
| <i>p</i> -Coumaric acid | 24.72-26.21          | 0.56-142.86          | $y = 44.809x - 22.611$     | 0.9991                                    | 0.57        | 1.73        | 1.97    |
| Ferulic acid            | 27.88-28.92          | 0.56-142.86          | $y = 42.477x - 16.212$     | 0.9990                                    | 0.49        | 1.48        | 1.58    |
| Sinapic acid            | 28.61-29.45          | 0.39-100.00          | $y = 63.807x + 10.841$     | 1.0000                                    | 0.22        | 0.68        | 1.01    |
| <b>Flavonoids</b>       |                      |                      |                            |                                           |             |             |         |
| Hesperidin              | 38.06-38.64          | 0.65-333.33          | $y = 24.424x + 76.057$     | 0.9990                                    | 2.56        | 7.77        | 0.64    |
| Myricetin               | 39.45-40.02          | 0.65-166.67          | $y = 43.048x + 16.879$     | 0.9999                                    | 0.37        | 1.12        | 0.32    |
| Quercetin               | 44.58-44.75          | 0.65-166.67          | $y = 46.975x + 38.753$     | 0.9999                                    | 0.19        | 0.58        | 0.10    |
| Luteolin                | 44.87-45.54          | 0.65-166.67          | $y = 44.717x + 28.899$     | 0.9999                                    | 1.19        | 3.62        | 0.52    |
| Naringenin              | 45-41-45.87          | 0.65-333.33          | $y = 30.205x + 46.292$     | 0.9999                                    | 0.46        | 1.38        | 0.45    |
| Kaempferol              | 47.74-47.96          | 0.65-166.67          | $y = 47.952x + 43.855$     | 0.9999                                    | 0.14        | 0.42        | 0.12    |
| Apigenin                | 47.61-48.10          | 0.39-200.00          | $y = 40.778x + 34.994$     | 0.9999                                    | 2.22        | 6.73        | 0.44    |
| Isorhamnetin            | 48.15-48.69          | 1.30-333.33          | $y = 16.302x + 46.483$     | 0.9992                                    | 0.45        | 1.37        | 0.39    |
| <b>Anthocyanidins</b>   |                      |                      |                            |                                           |             |             |         |
| Delphinidin             | 9.44-9.48            | 2.58-330.00          | $y = 1.6280x + 5.0454$     | 0.9992                                    | 0.77        | 2.34        | 0.45    |
| Cyanidin                | 16.74-16.85          | 2.58-330.00          | $y = 1.5641x + 4.4497$     | 0.9995                                    | 0.05        | 0.15        | 0.58    |
| Petunidin               | 18.26-18.33          | 3.91-125.00          | $y = 1.2904x + 4.4487$     | 0.9951                                    | 0.78        | 2.36        | 0.28    |
| Peonidin                | 36.62-36.96          | 2.58-330.00          | $y = 1.8154x + 4.1796$     | 0.9995                                    | 3.08        | 9.34        | 0.73    |
| Malvidin                | 42.51-42.61          | 3.91-125.00          | $y = 0.6093x + 4.1012$     | 0.9945                                    | 1.82        | 5.53        | 0.24    |

# Supplementary Figure S1:

High-performance liquid chromatograms of fresh, steamed, and fermented tea leaves detected at 280, 325, and 524 nm.

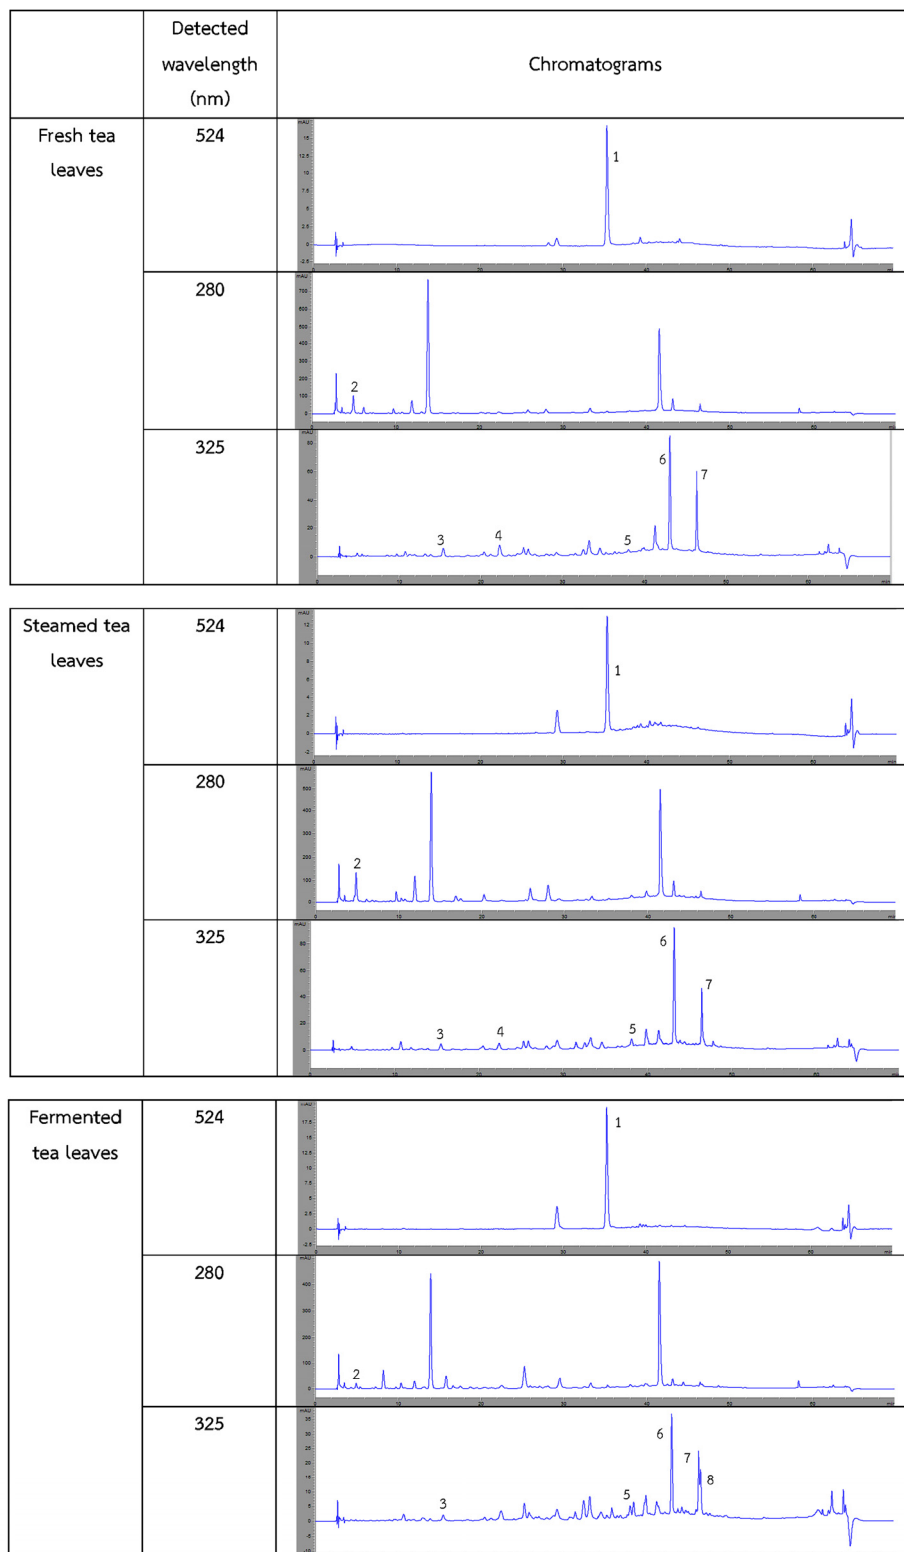

1 = cyanidin, 2 = gallic acid, 3 = caffeic acid, 4 = *p*-courmaric acid, 5 = myricetin, 6= querceitn, 7 = kaempferol, 8 = apigenin
